# Supplementary material for: Mobile atmospheric measurements and local-scale inverse estimation of the location and rates of brief CH 4 and CO 2 releases from point sources
Source: Copernicus journal article supplement (doi:10.5194/amt-14-5987-2021), 2021-09-08
Supplement: Supplementary file 1 [file amt-14-5987-2021-supplement.pdf]

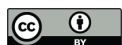

*Supplement of*

**Mobile atmospheric measurements and local-scale inverse estimation of the location and rates of brief CH<sub>4</sub> and CO<sub>2</sub> releases from point sources**

**Pramod Kumar et al.**

*Correspondence to:* Pramod Kumar ([pramod.kumar@lsce.ipsl.fr](mailto:pramod.kumar@lsce.ipsl.fr))

The copyright of individual parts of the supplement might differ from the article licence.

## List of Figures

|    |     |                                                                                                                                                                                                                                                                                                        |    |
|----|-----|--------------------------------------------------------------------------------------------------------------------------------------------------------------------------------------------------------------------------------------------------------------------------------------------------------|----|
|    | S1  | Release locations (red stars) in the ATEX zone. Different releases can have identical locations. Isolated locations (5, 8, 12-16) correspond to the highest release rates. . . . .                                                                                                                     | 2  |
| 5  | S2  | Contour plots of (a) $J_p$ , (b) $J_w$ , and (c) $J$ when fixing the release rate to its inverted value $Q_e$ for release no. 1. Red and white stars respectively show the actual and inverted source locations. . . . .                                                                               | 3  |
|    | S3  | Contour plots of (a) $J_p$ , (b) $J_w$ , and (c) $J$ when fixing the release rate to its inverted value $Q_e$ for release no. 2. Red and white stars respectively show the actual and inverted source locations. . . . .                                                                               | 3  |
|    | S4  | Contour plots of (a) $J_p$ , (b) $J_w$ , and (c) $J$ when fixing the release rate to its inverted value $Q_e$ for release no. 3. Red and white stars respectively show the actual and inverted source locations. . . . .                                                                               | 3  |
| 10 | S5  | Contour plots of (a) $J_p$ , (b) $J_w$ , and (c) $J$ when fixing the release rate to its inverted value $Q_e$ for release no. 4. Red and white stars respectively show the actual and inverted source locations. . . . .                                                                               | 4  |
|    | S6  | Contour plots of (a) $J_p$ , (b) $J_w$ , and (c) $J$ when fixing the release rate to its inverted value $Q_e$ for release no. 5. Red and white stars respectively show the actual and inverted source locations. . . . .                                                                               | 4  |
| 15 | S7  | Contour plots of (a) $J_p$ , (b) $J_w$ , and (c) $J$ when fixing the release rate to its inverted value $Q_e$ for release no. 6. Red and white stars respectively show the actual and inverted source locations. . . . .                                                                               | 4  |
|    | S8  | Contour plots of (a) $J_p$ , (b) $J_w$ , and (c) $J$ when fixing the release rate to its inverted value $Q_e$ for release no. 7. Red and white stars respectively show the actual and inverted source locations. . . . .                                                                               | 5  |
|    | S9  | Contour plots of (a) $J_p$ , (b) $J_w$ , and (c) $J$ when fixing the release rate to its inverted value $Q_e$ for release no. 8. Red and white stars respectively show the actual and inverted source locations. . . . .                                                                               | 5  |
| 20 | S10 | Contour plots of (a) $J_p$ , (b) $J_w$ , and (c) $J$ when fixing the release rate to its inverted value $Q_e$ for release no. 9. Red and white stars respectively show the actual and inverted source locations. . . . .                                                                               | 5  |
|    | S11 | Contour plots of (a) $J_p$ , (b) $J_w$ , and (c) $J$ when fixing the release rate to its inverted value $Q_e$ for release no. 10. Red and white stars respectively show the actual and inverted source locations. . . . .                                                                              | 6  |
| 25 | S12 | Contour plots of (a) $J_p$ , (b) $J_w$ , and (c) $J$ when fixing the release rate to its inverted value $Q_e$ for release no. 11. Red and white stars respectively show the actual and inverted source locations. . . . .                                                                              | 6  |
|    | S13 | Contour plots of (a) $J_p$ , (b) $J_w$ , and (c) $J$ when fixing the release rate to its inverted value $Q_e$ for release no. 12. Red and white stars respectively show the actual and inverted source locations. . . . .                                                                              | 6  |
|    | S14 | Contour plots of (a) $J_p$ , (b) $J_w$ , and (c) $J$ when fixing the release rate to its inverted value $Q_e$ for release no. 13. Red and white stars respectively show the actual and inverted source locations. . . . .                                                                              | 7  |
| 30 | S15 | Contour plots of (a) $J_p$ , (b) $J_w$ , and (c) $J$ when fixing the release rate to its inverted value $Q_e$ for release no. 14. Red and white stars respectively show the actual and inverted source locations. . . . .                                                                              | 7  |
|    | S16 | Contour plots of (a) $J_p$ , (b) $J_w$ , and (c) $J$ when fixing the release rate to its inverted value $Q_e$ for release no. 15. Red and white stars respectively show the actual and inverted source locations. . . . .                                                                              | 7  |
| 35 | S17 | Contour plots of (a) $J_p$ , (b) $J_w$ , and (c) $J$ when fixing the release rate to its inverted value $Q_e$ for release no. 16. Red and white stars respectively show the actual and inverted source locations. . . . .                                                                              | 8  |
|    | S18 | Average errors for all (a) $\text{CH}_4$ and (b) $\text{CO}_2$ releases with respect to $\lambda$ in the cost function $J = J_p + \lambda J_w$ . . . .                                                                                                                                                 | 9  |
|    | S19 | Average errors for all (a) $\text{CH}_4$ and (b) $\text{CO}_2$ releases with respect to $\lambda$ in the cost function $J^{log} = J_p^{log} + \lambda J_w$ . . .                                                                                                                                       | 9  |
| 40 | S20 | Contour plots of (a) $J_p$ (b) $\lambda J_w$ , and (c) $J = J_p + \lambda J_w$ when fixing the release rate to its inverted value $Q_e$ for release no. 2 and when using $\lambda = 1.6\%$ . Red and white stars respectively show the actual and inverted source locations. . . . .                   | 10 |
|    | S21 | Contour plots of (a) $J_p^{log}$ (b) $\lambda J_w$ , and (c) $J^{log} = J_p^{log} + \lambda J_w$ when fixing the release rate to its inverted value $Q_e$ for release no. 2 and when using $\lambda = 0.8\%$ . Red and white stars respectively show the actual and inverted source locations. . . . . | 10 |

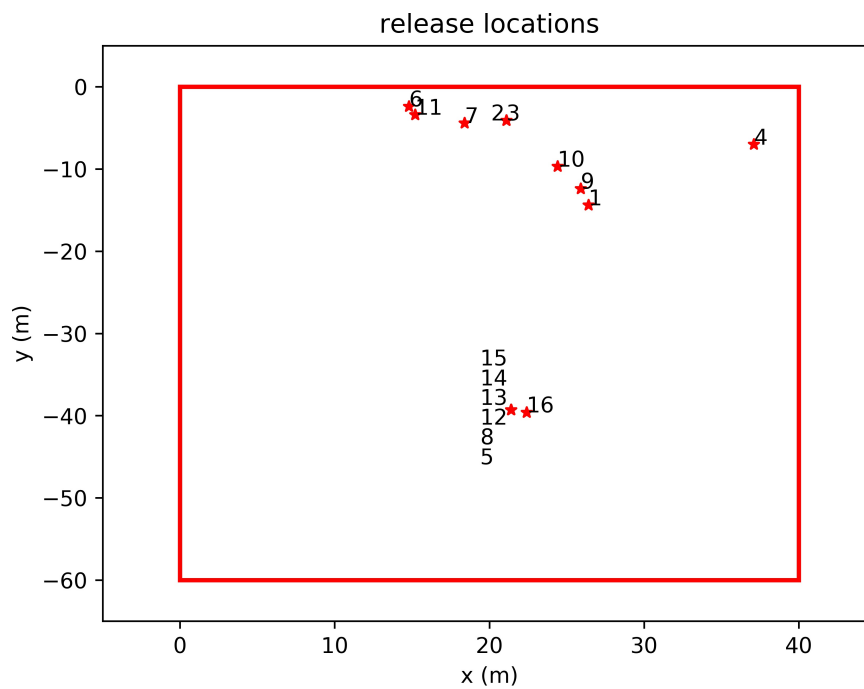

**Figure S1.** Release locations (red stars) in the ATEX zone. Different releases can have identical locations. Isolated locations (5, 8, 12-16) correspond to the highest release rates.

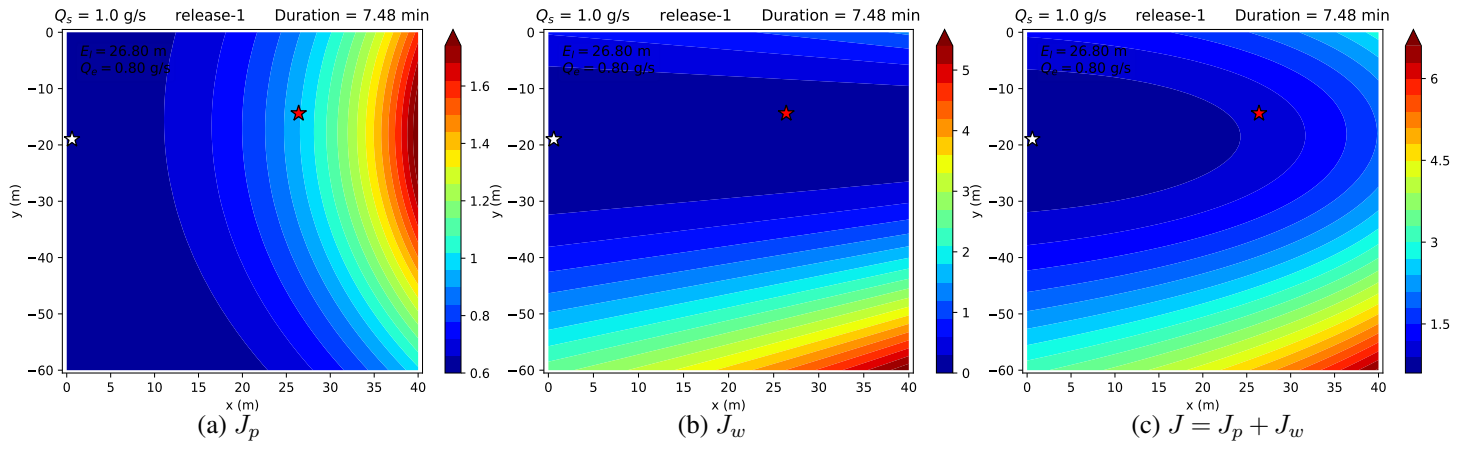

**Figure S2.** Contour plots of (a)  $J_p$ , (b)  $J_w$ , and (c)  $J$  when fixing the release rate to its inverted value  $Q_e$  for release no. 1. Red and white stars respectively show the actual and inverted source locations.

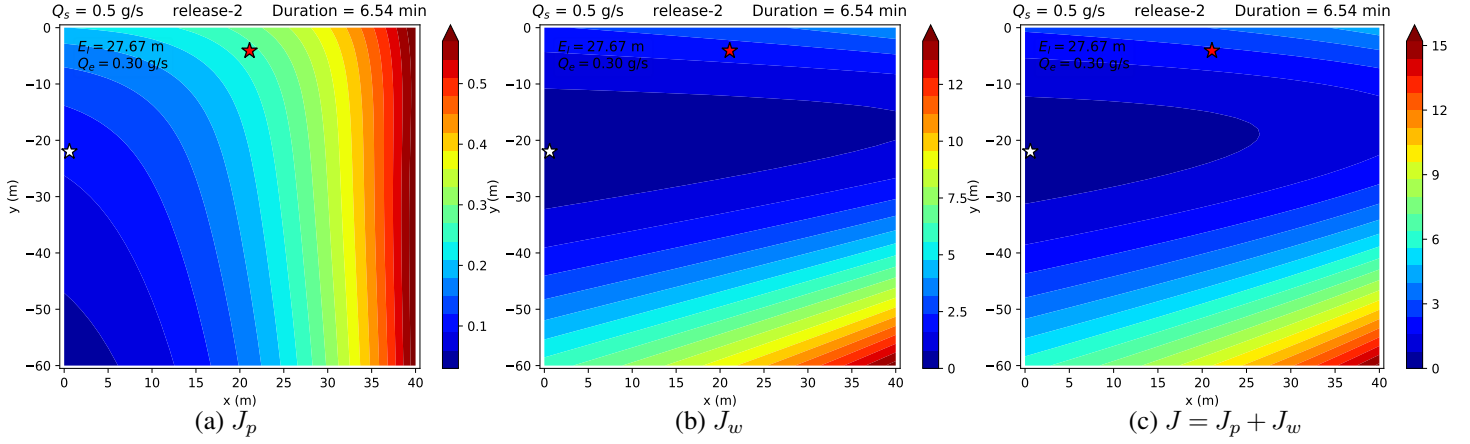

**Figure S3.** Contour plots of (a)  $J_p$ , (b)  $J_w$ , and (c)  $J$  when fixing the release rate to its inverted value  $Q_e$  for release no. 2. Red and white stars respectively show the actual and inverted source locations.

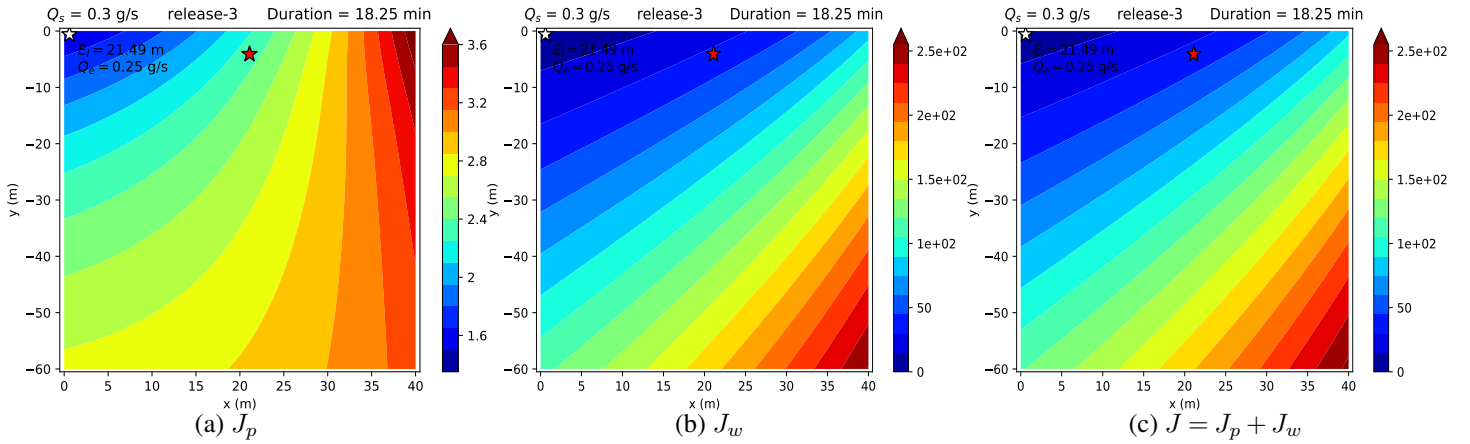

**Figure S4.** Contour plots of (a)  $J_p$ , (b)  $J_w$ , and (c)  $J$  when fixing the release rate to its inverted value  $Q_e$  for release no. 3. Red and white stars respectively show the actual and inverted source locations.

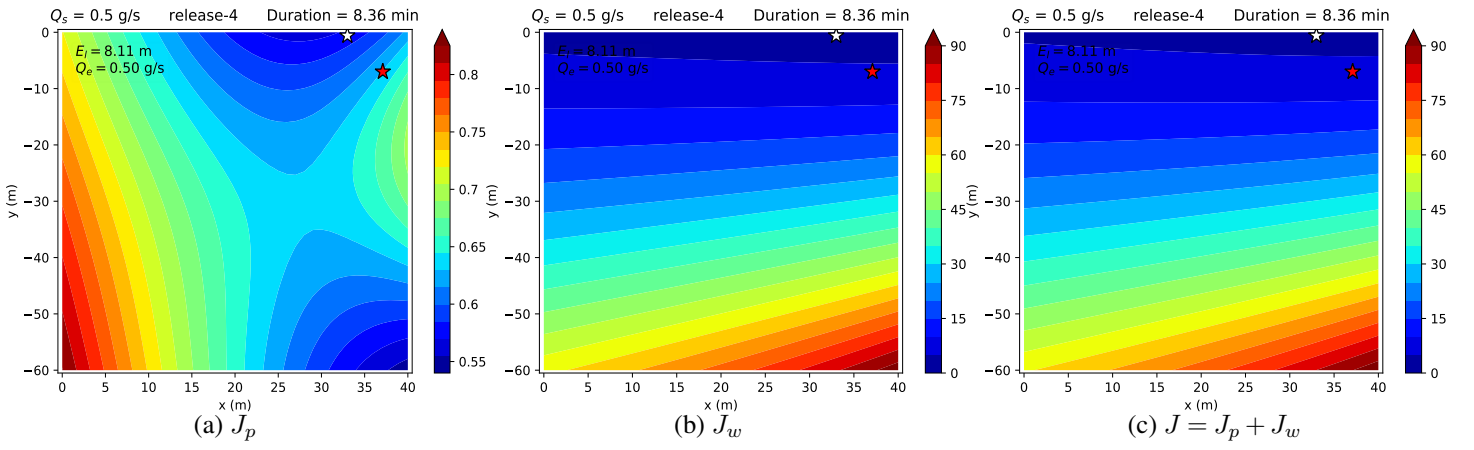

**Figure S5.** Contour plots of (a)  $J_p$ , (b)  $J_w$ , and (c)  $J$  when fixing the release rate to its inverted value  $Q_e$  for release no. 4. Red and white stars respectively show the actual and inverted source locations.

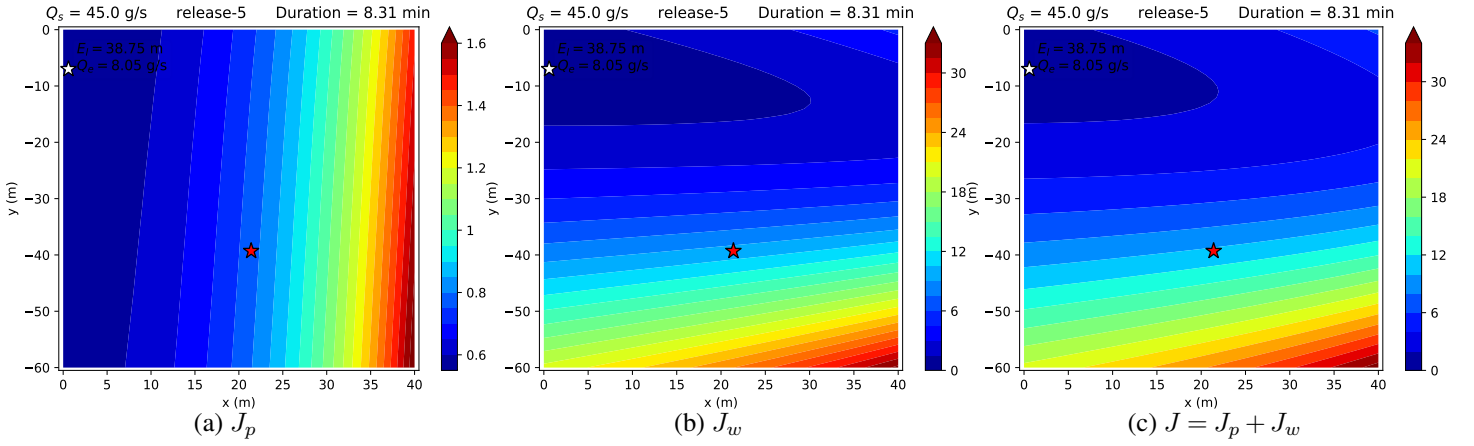

**Figure S6.** Contour plots of (a)  $J_p$ , (b)  $J_w$ , and (c)  $J$  when fixing the release rate to its inverted value  $Q_e$  for release no. 5. Red and white stars respectively show the actual and inverted source locations.

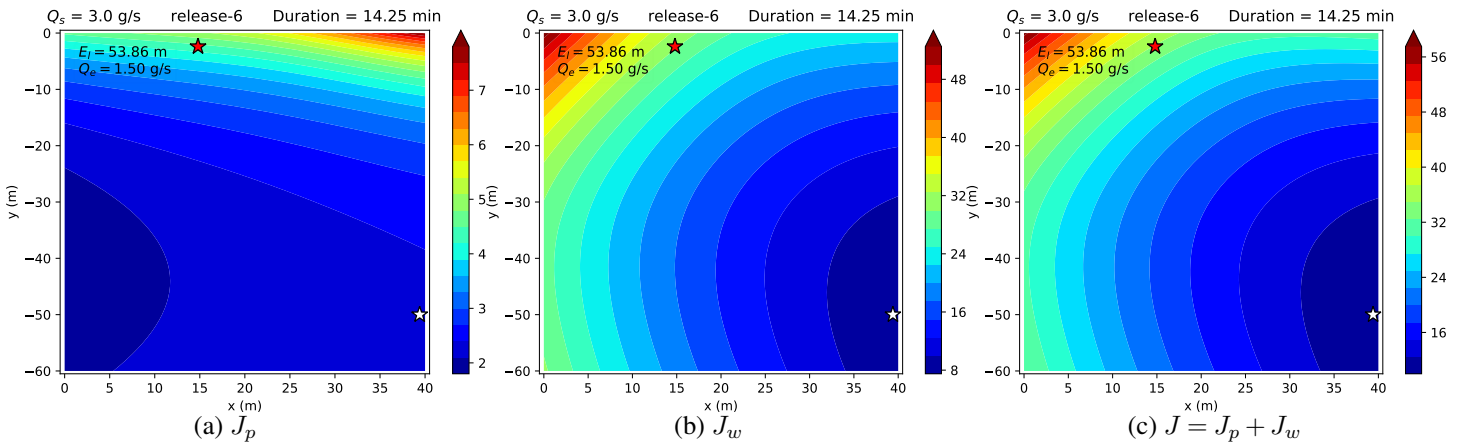

**Figure S7.** Contour plots of (a)  $J_p$ , (b)  $J_w$ , and (c)  $J$  when fixing the release rate to its inverted value  $Q_e$  for release no. 6. Red and white stars respectively show the actual and inverted source locations.

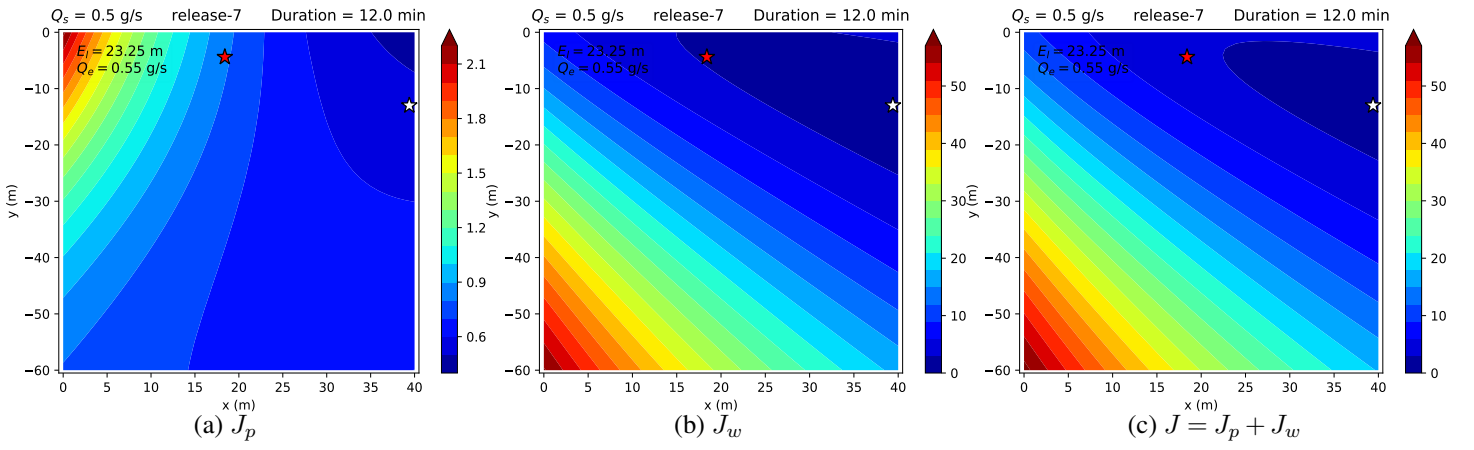

**Figure S8.** Contour plots of (a)  $J_p$ , (b)  $J_w$ , and (c)  $J$  when fixing the release rate to its inverted value  $Q_e$  for release no. 7. Red and white stars respectively show the actual and inverted source locations.

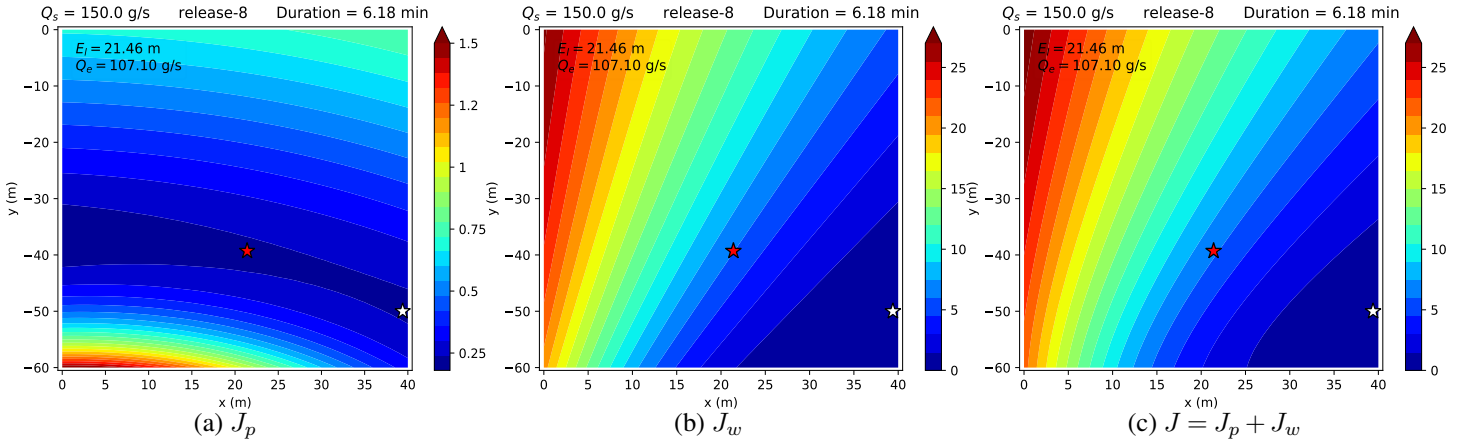

**Figure S9.** Contour plots of (a)  $J_p$ , (b)  $J_w$ , and (c)  $J$  when fixing the release rate to its inverted value  $Q_e$  for release no. 8. Red and white stars respectively show the actual and inverted source locations.

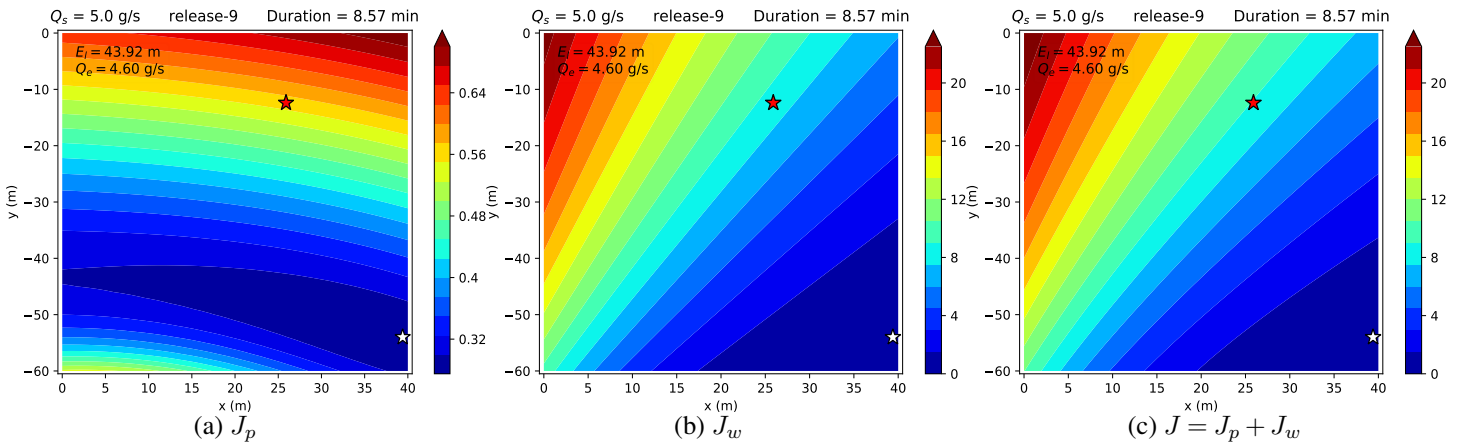

**Figure S10.** Contour plots of (a)  $J_p$ , (b)  $J_w$ , and (c)  $J$  when fixing the release rate to its inverted value  $Q_e$  for release no. 9. Red and white stars respectively show the actual and inverted source locations.

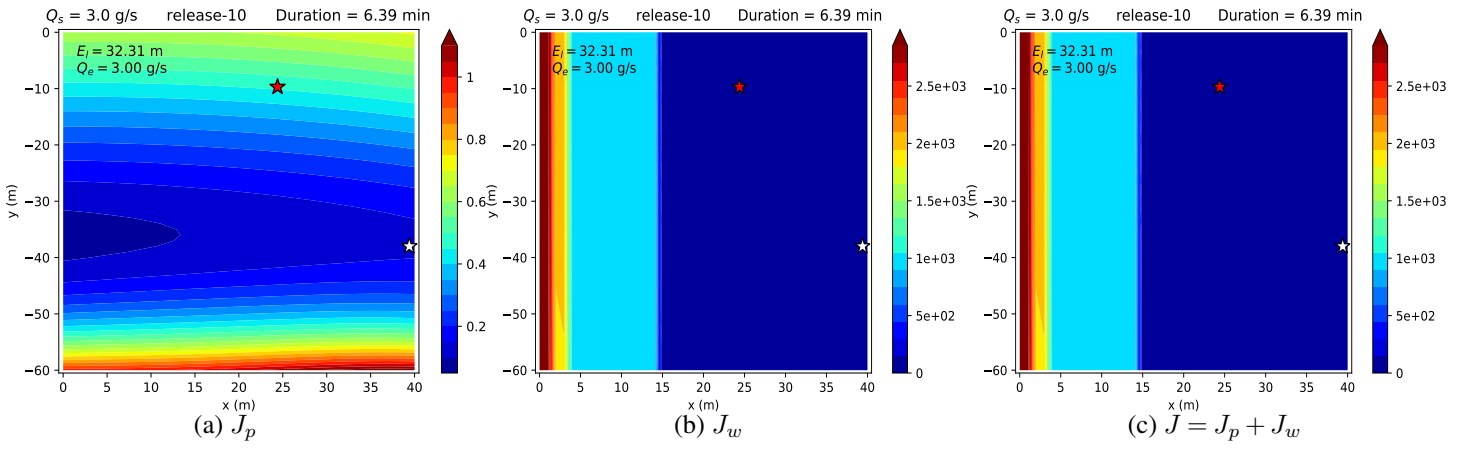

**Figure S11.** Contour plots of (a)  $J_p$ , (b)  $J_w$ , and (c)  $J$  when fixing the release rate to its inverted value  $Q_e$  for release no. 10. Red and white stars respectively show the actual and inverted source locations.

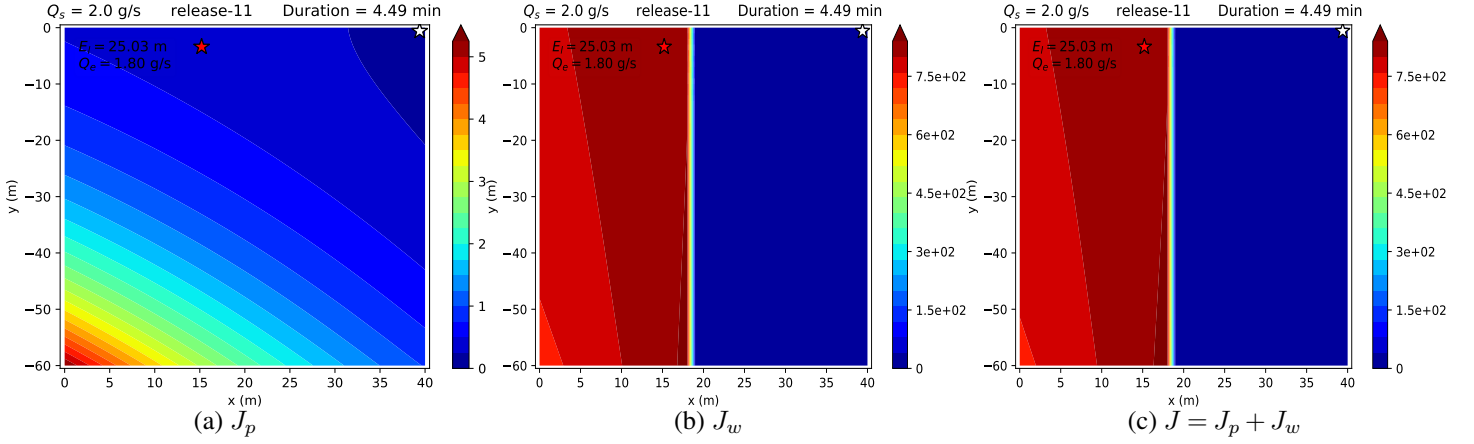

**Figure S12.** Contour plots of (a)  $J_p$ , (b)  $J_w$ , and (c)  $J$  when fixing the release rate to its inverted value  $Q_e$  for release no. 11. Red and white stars respectively show the actual and inverted source locations.

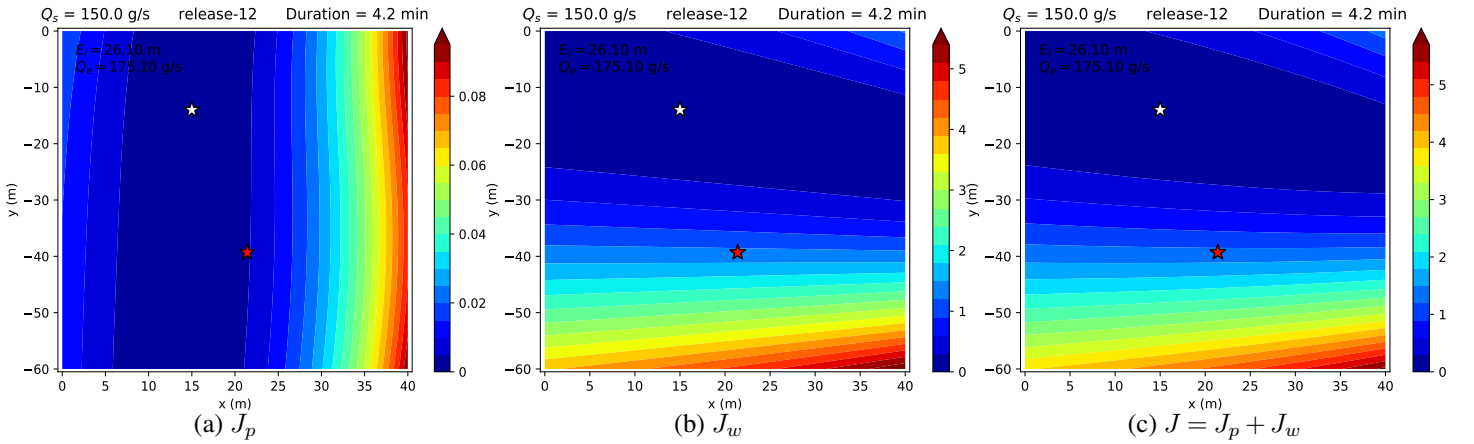

**Figure S13.** Contour plots of (a)  $J_p$ , (b)  $J_w$ , and (c)  $J$  when fixing the release rate to its inverted value  $Q_e$  for release no. 12. Red and white stars respectively show the actual and inverted source locations.

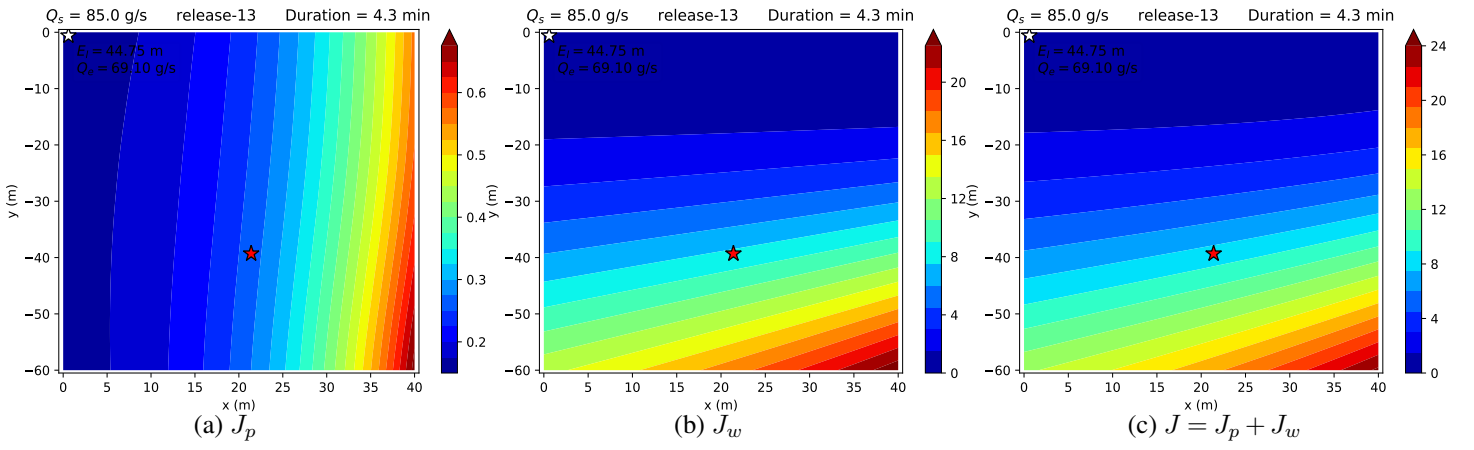

**Figure S14.** Contour plots of (a)  $J_p$ , (b)  $J_w$ , and (c)  $J$  when fixing the release rate to its inverted value  $Q_e$  for release no. 13. Red and white stars respectively show the actual and inverted source locations.

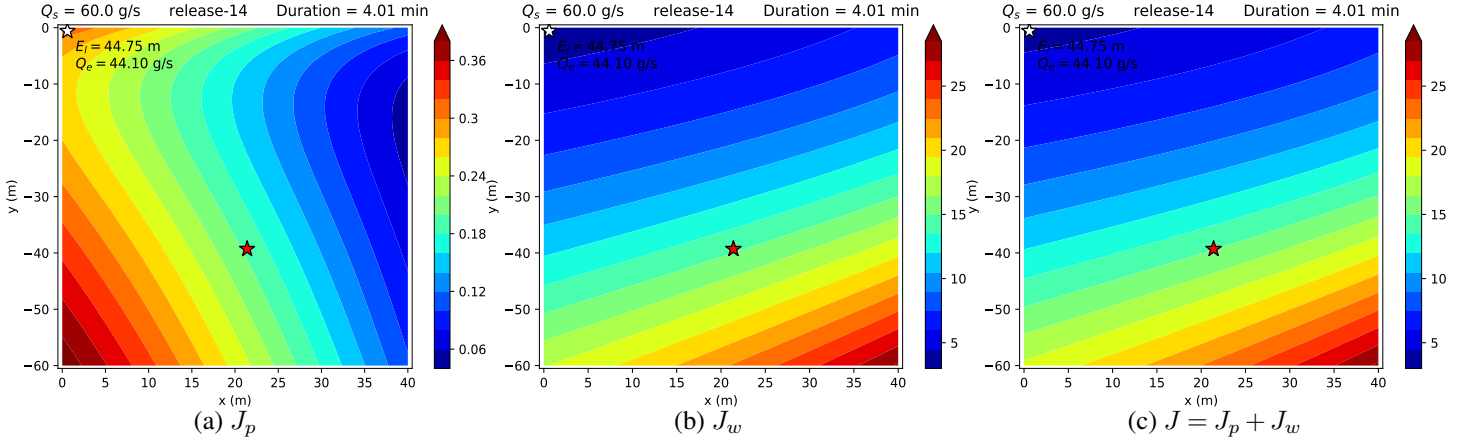

**Figure S15.** Contour plots of (a)  $J_p$ , (b)  $J_w$ , and (c)  $J$  when fixing the release rate to its inverted value  $Q_e$  for release no. 14. Red and white stars respectively show the actual and inverted source locations.

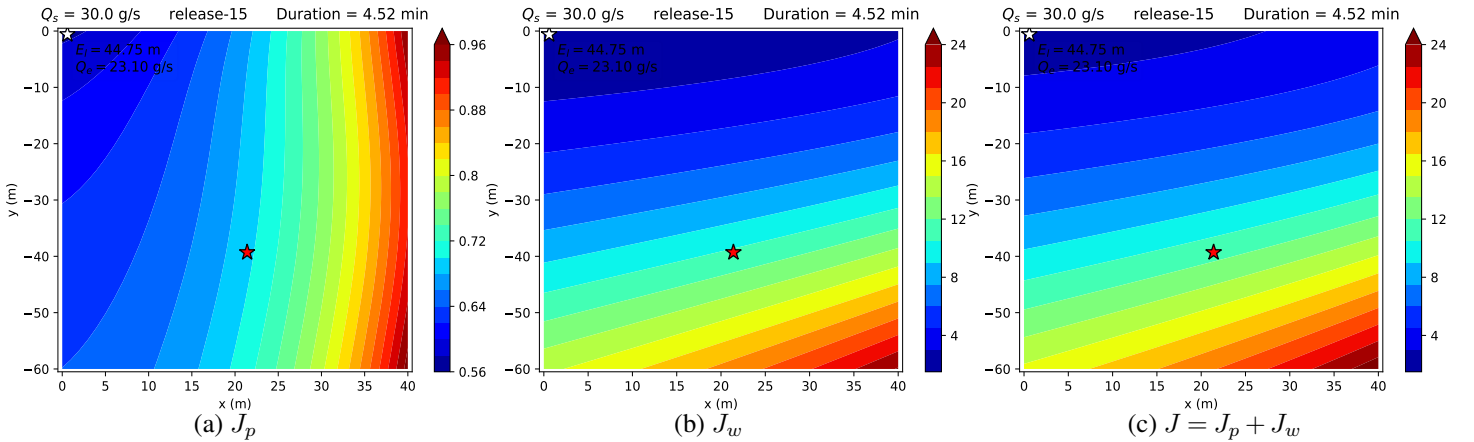

**Figure S16.** Contour plots of (a)  $J_p$ , (b)  $J_w$ , and (c)  $J$  when fixing the release rate to its inverted value  $Q_e$  for release no. 15. Red and white stars respectively show the actual and inverted source locations.



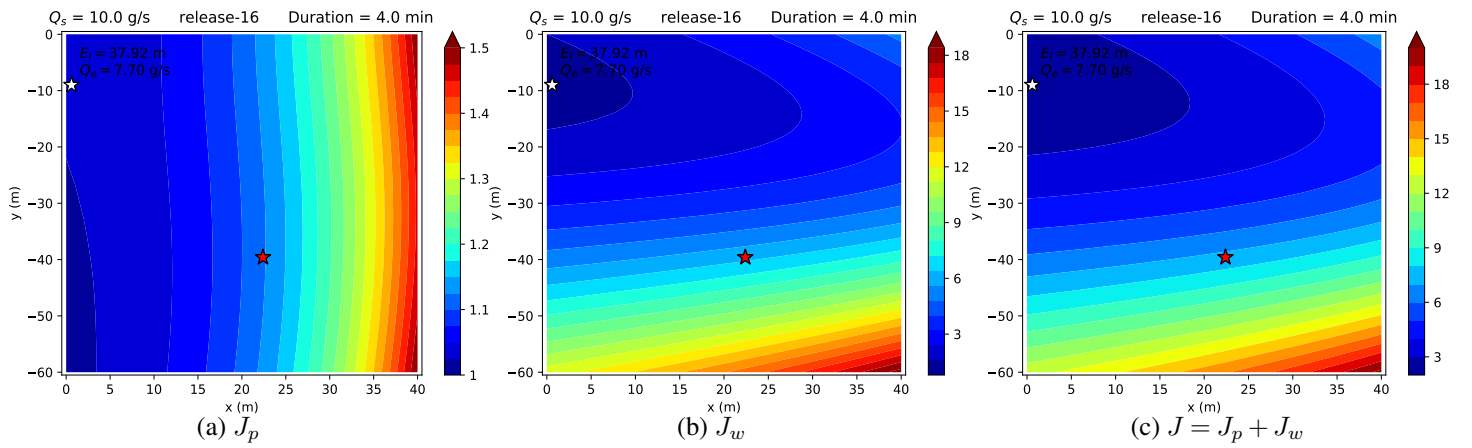

**Figure S17.** Contour plots of (a)  $J_p$ , (b)  $J_w$ , and (c)  $J$  when fixing the release rate to its inverted value  $Q_e$  for release no. 16. Red and white stars respectively show the actual and inverted source locations.

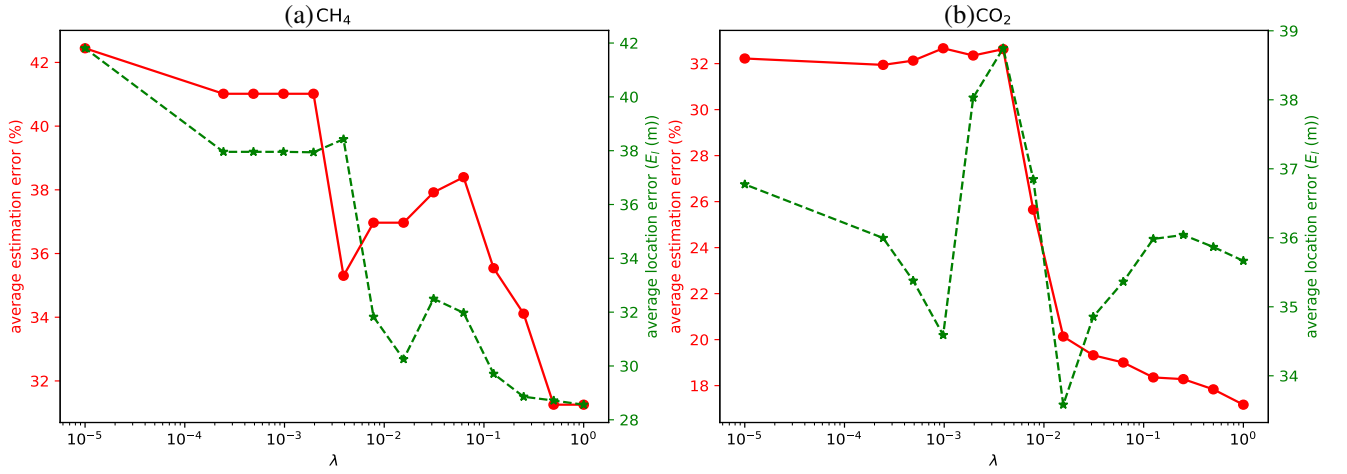

**Figure S18.** Average errors for all (a) CH<sub>4</sub> and (b) CO<sub>2</sub> releases with respect to  $\lambda$  in the cost function  $J = J_p + \lambda J_w$ .

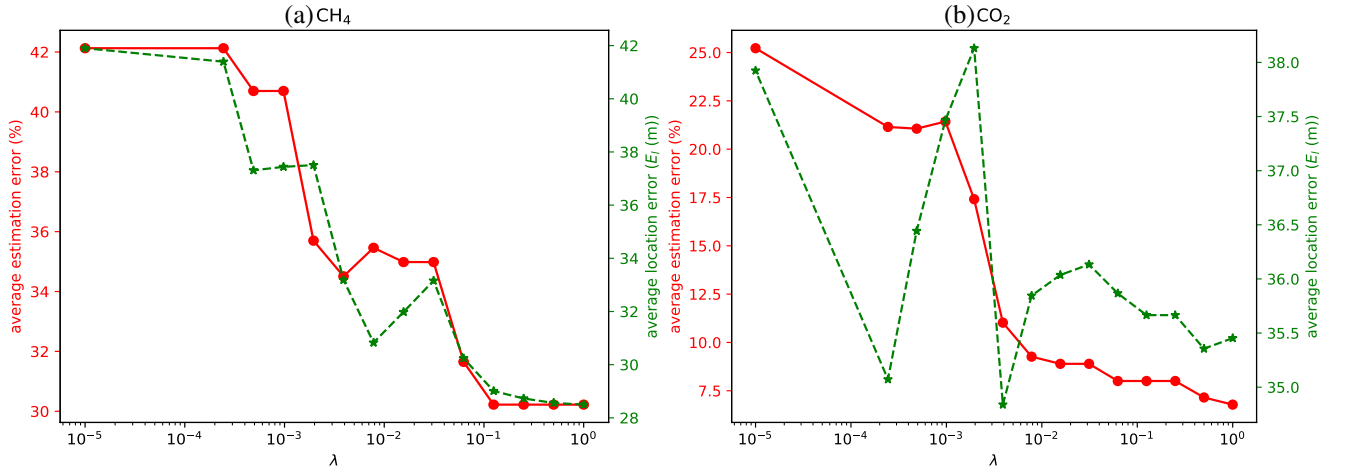

**Figure S19.** Average errors for all (a) CH<sub>4</sub> and (b) CO<sub>2</sub> releases with respect to  $\lambda$  in the cost function  $J^{log} = J_p^{log} + \lambda J_w$ .

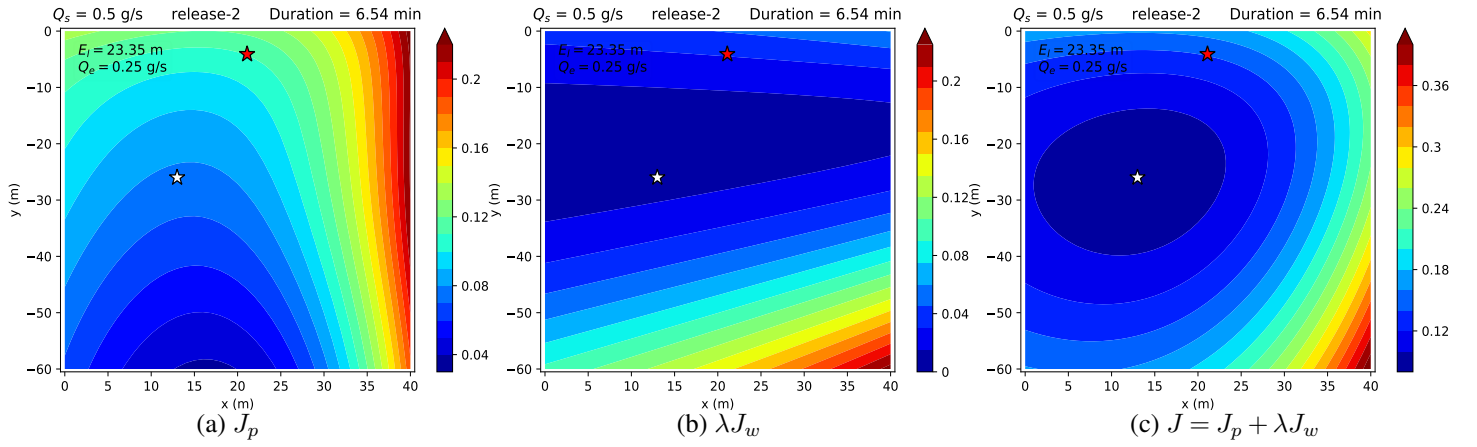

**Figure S20.** Contour plots of (a)  $J_p$  (b)  $\lambda J_w$ , and (c)  $J = J_p + \lambda J_w$  when fixing the release rate to its inverted value  $Q_e$  for release no. 2 and when using  $\lambda = 1.6\%$ . Red and white stars respectively show the actual and inverted source locations.

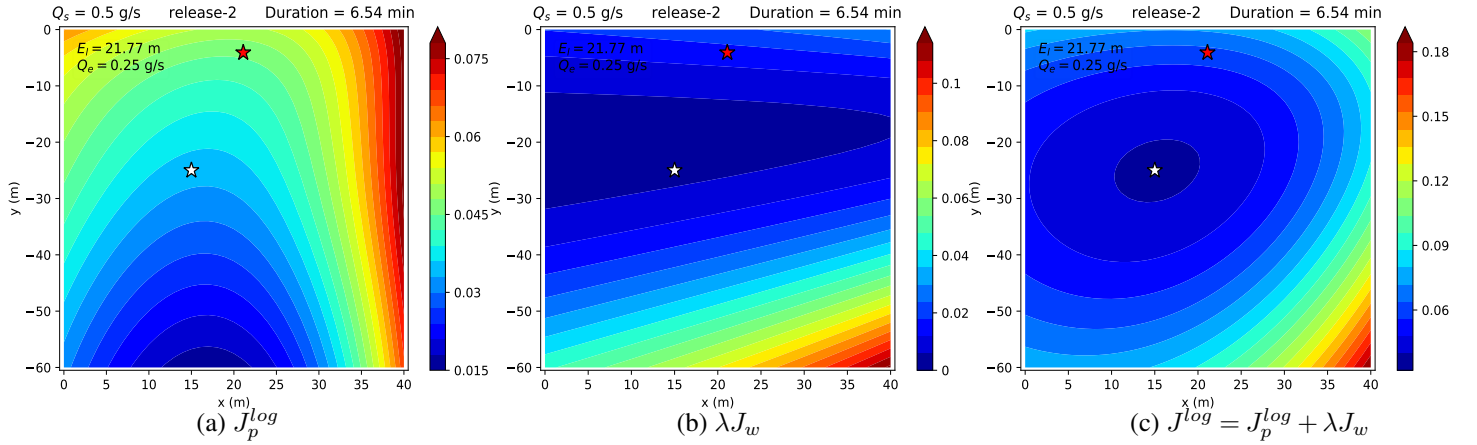

**Figure S21.** Contour plots of (a)  $J_p^{log}$  (b)  $\lambda J_w$ , and (c)  $J^{log} = J_p^{log} + \lambda J_w$  when fixing the release rate to its inverted value  $Q_e$  for release no. 2 and when using  $\lambda = 0.8\%$ . Red and white stars respectively show the actual and inverted source locations.
